# Supplementary material for: miR-191-5p suppresses PRRSV replication by targeting porcine EGFR to enhance interferon signaling
Source: Front Microbiol. 2024 Oct 14;15:1473504. doi: 10.3389/fmicb.2024.1473504 (PMC11514493; doi:10.3389/fmicb.2024.1473504)
Supplement: Supplementary file 1 [file Table_1.XLSX]

## Sheet: Sheet1
Predicted potential miR-191-5p targets
Pig	Monkey	Human
S1PR5	SLC7A1	TSC1
PDE4A	FRY	HLCS
PPARD	CKAP2	FUT2
GPATCH4	MACROD2	mitochondrial
CDH24	PDZD2	CRH
SEPTIN2	RICTOR	RPL23
SLC25A15	TNKS	BICD2
FUBP3	TEX15	KIAA0930
CCNY	ZCCHC24	SEPTIN5
TDRD10	UNC5B	HACD4
FKBP5	HPS1	PDLIM5
ITGB1	TGIF2	NTRK3
EGFR	ABLIM1	MPST
CDKN1B	EMX2	FAM227A
OXSR1	LOC103216642	LHX9
MIR224	IKZF5	SP3
MIR9796	TCF7L2	AP1G1
BRI3BP	TFCP2L1	MACROD2
TBC1D15	HOXD8	SSX4B
RAB4A	PLEKHM3	NRCAM
SLC39A9	ATG9A	SIDT2
DNAL1	HSPA13	HEY1
CHD2	YBX3	QSER1
CCDC93	BCL2L14	CREBBP
RNF139	LMO3	ZNF275
MAB21L1	KRAS	CEP57L1
TLL2	COL27A1	ZNF154
DR1	ZBTB21	ABR
LRRC49	PPAPDC2	PHACTR2
TCF7L2	BICD2	TBC1D14
SLC35B3	CDC14B	NCBP3
RIDA	LBH	PLAG1
FBLN5	PPP1CB	LIN54
CAMKK2	EFR3B	SLC6A12
FBXO30	UBXN2A	MYRF
TBPL1	KLHL29	PEX26
HDDC2	TRAPPC12	SLC39A13
SLC39A13	PLCD1	SMARCA4
FGFR4	NAALADL2	PLCD1
DCP2	RBM4	SATB1
TMEM270	ANKS1A	DCTN4
ANKS4B	MAP3K1	TP53INP1
C3H16orf91	SMIM15	BEAN1
SERTAD2	LOC103222007	RCC2
ASXL2	SOX4	IFFO2
SEC31B	B4GALT6	BTBD19
STRIP1	CABLES1	MORF4L2
CDC7	CRKL	CALCOCO1
CDPF1	2024-09-05	TCTN3
BTBD11	POLK	FIBCD1
MAP3K12	FAM109B	YBX3
HOXC5	CAPZA1	TCF7L2
ZC3H10	KNCN	DDHD1
KRR1	BTBD19	TMC7
NR2C1	ZNF362	IGF2BP1
GAN	HDAC1	MOSMO
AP1G1	WASF2	ENDOV
HAUS5	RCC2	NPAS3
UBIAD1	AJAP1	EMX2
MRLC2	TSPAN13	SCN1A
SLC35D1	ATXN7L1	NAV1
PPCS	NRCAM	C3orf80
RBPJ	CEP41	RIMS1
BEND4	CCR9	TENT4A
CXXC4	DUSP7	PPARGC1B
ARRB1	SFMBT1	BRD7
DCUN1D5	GLYR1	ASTN2
ZBTB44	ARL6IP5	MYNN
ADAM22	CHMP2B	NCOR1
ATXN7L1	NPAS3	MAP3K12
RABGAP1L	BRMS1L	TMEM178B
USP6NL	MPP5	SYS1
RAB11FIP4	EML5	AMMECR1L
GOSR1	USP31	TGIF2
DUSP7	CDC42BPA	HOXD8
ANKRD13A	TOR1AIP1	PPT2
ACKR3	RCCD1	MDM4
SAP30L	CREBBP	ZNF664-RFLNA
SRXN1	FAM120C	CCNT1
GALNTL5	TMEM80	UNC5B
TMEM213	TAF7L	CHST9
ZNRF2	AMMECR1	COPS4
LOC100524598	ENOX2	CLEC4F
RAB39B	AFF2	TOR1AIP1
SLC12A9	CMTR2	MIGA1
PCYOX1	AP1G1	STOM
FAM91A1	TCF3	VPS72
CIAPIN1	LYL1	CEP164
GIPC2	HSH2D	SMC1A
PPP2R1B	GATAD2A	UBAP2
RAB29	AKT1S1	KCNK9
SNX13	NCR1	CEBPB
SLC30A10	LIN54	DOCK1
HRK	COPS4	PHF3
PTPRE	SLC39A13	RXRA
LOC100624648	LRP4	SSR1
IL1RAPL1	POU4F2	AZIN2
KCNQ5	CRH	CAMSAP2
EPHA7	RDH10	PITPNM2
ATPAF1	HEY1	GATAD2A
BTD	RNF139	QKI
TTLL9	TRAF6	SS18L1
LYL1	ARHGAP39	LPIN3
LUZP1	PFKFB3	CEP20
PRKAG2	BEND7	SLK
AFF2	QSER1	GLYR1
GNA15	KIAA1462	ARHGAP39
DNAJC6	CCNT1	PCYT1A
AK4	SMARCD1	EFR3B
RBPMS2	LOC103238458	ZNF431
SLC28A2	MSI1	ISCU
GARNL3	LOC103239322	GORAB
LIMS1	LOC103239515	TRDMT1
POU3F3	FAM78A	NPAT
FAM84B	FIBCD1	RPS6KA5
SNX7	CTR9	CAMK4
KCNA7	PHACTR2	PSMF1
RREB1	BEND3	CAND1
PAN3	ADRA2B	MPDU1
EMX2	LIMS1	B4GALT6
ERLIN2	LOC103241216	CCNI
BDP1	C15H3orf80	TMEM255B
NEURL1B	P2RY1	JCAD
SOX4	LOC103241899	VPS33A
RRP15	LOC103242006	ZDHHC2
ATG2B	ABR	SH3PXD2A
GAS7	FAM101B	RFLNA
TRAK2	LOC103242224	BCL11A
SYNJ1	MPDU1	USP42
SH3PXD2A	CENPV	L3MBTL4
DLX1	C16H17orf78	RABGAP1L
SLC35B4	PCTP	SNX6
LOC102161030	MBTD1	CDKL1
FUT9	SS18L1	MROH2A
LOC102158569	FAM217B	SYT15B
COL27A1	IGF2BP1	ZNF362
LMTK2	CCDC57	BCL2L14
BCL7C	TTC25	LONRF2
REEP1	LOC103243882	SHANK3
USP34	RIMS1	BEND7
LBH	SALL3	MAP4
TRMT12	ZNF516	N4BP2L2
PKN2	CEBPB	USP31
JPH3	GRAMD3	RAMACL
PPFIBP2	KCNB1	FAM78A
TRIM66	HARS	TUSC3
LOC110255349	PPARGC1B	MSI1
LOC110255384	NDST1	DR1
ZBTB16	WFDC5	DUSP7
NRCAM	DENND4A	FRK
DDX58	CTDSPL2	PPP1CB
GPATCH2	PCDH7	PRKAR2B
2024-03-01	TBC1D14	QSOX1
ENAH	CALN1	SLC7A1
PRKCQ	LMTK2	SMARCD1
AMER2	LOC103247830	SOX4
WASF3	POFUT1	TIMP2
SOX1	NPAT	HRK
SPATA22	FLT1	CPNE3
MSI2	LOC103214449	FUBP3
SREBF1	C4H5orf42	CDK5R2
SHISA6	LOC103215618	GMFB
CBX2	LOC103215902	MFHAS1
STXBP4	LOC103217845	CYTH2
HLF	LOC103220455	AKAP6
ZBTB4	LOC103220876	AKAP5
TMEM102	LOC103221230	PGGT1B
BORCS6	LOC103222515	CBFA2T3
KCNJ12	LOC103224431	CRKL
DENND6A	LOC103225543	SSX4
RBMS3	LOC103225754	MAP3K1
DCBLD2	LOC103226851	CAPZA1
TRAPPC10	LOC103227244	SLC5A3
NAALADL2	LOC103227322	HSPA13
LOC106508546	HESX1	FICD
ADARB1	LOC103228232	RNF139
LGALS8	HEATR1	PXMP4
SPTLC1	LOC103232603	OR52A1
CCDC63	SUGP2	RSU1
RIMS1	LOC103234738	MAGEH1
ERCC6	LOC103236173	CRIPT
BRAP	LOC103236392	TSPAN13
2024-09-02	LOC103237266	CEP350
SCRN3	LOC103237285	PDGFC
CNTNAP5	LOC103238582	USP18
HDAC4	POC1B	HIF1AN
SATB2	LOC103238846	AJAP1
SPAG16	LOC103239419	LRRC47
AMMECR1L	LOC103239661	COA7
GRIA1	LOC103240088	NOTCH2
TGIF2	LOC103242716	SH3TC2
RALGAPB	LOC103243142	CHMP6
HUS1	LOC103246281	LRRK1
RAB19	LOC103246368	ZXDC
CDK13	RPN2	SGPP1
GLI3	CFC1	LBH
HECW1	LOC103247605	BRMS1L
DMD	MAML2	ADO
HDX	LOC103248291	COL27A1
TBL1X	LOC103248359	CDHR1
ZNF41		CBLN4
LOC100511059		DTD2
PAK3		HDGFL1
LOC110257938		RDH12
LHX3		ZCCHC24
IYD		RDH10
NCAN		MISP
TFB1M		KSR2
STK32A		NKX6-2
LOC110259815		PDZD2
BFAR		CENPV
LOC110259832		SPG7
SNX8		SMIM10L2A
DNAJC30		PLPP6
LOC100524794		ZDHHC24
TBC1D24		non-coding
PHACTR2		MIR224
KANSL3		BCKDHB
LOC100513982		DNAJB6
ARFGEF3		FAM153A
DHX57		SYT15
YIPF4		ANKS1B
RIT1		PDE1A
IL6R		SPAG16
ZHX2		C5orf34
TRPS1		TYW1
ASPH		AOPEP
LOC110260307		PACRG
LOC100154053		TRIM9
LRIG2		FBXL17
GDAP2		POLA1
SHANK3		LIMS4
NUP50		PLA2R1
SH3BP1		STK39
CRY1		SCN3A
AGO4		RHBDD1
ONECUT2		SAMD5
CMIP		TMEM26
LOC110261078		MRPS35
IFFO2		ABCC4
OTUD3		ADAMTS17
AK2		DCDC1
ZNF362		HFM1
USP1		LOC124900163
FOXJ3		TTC23L
WWOX		ERICH1
LOC110261309		IQANK1
ZNF304		CARS2
ANKS1A		FSIP1
UBR2		LOC124903496
OTUD7A		CFDP1
ZNF318		CSNK2A2
SALL3		C20orf173
CCDC85C		SEMA4F
NPAS3		NDUFA10
RAD51B		EVC
PRPF4B		LOC107985518
PPP3CA		LOC107985900
PCGF3		LOC107985957
CPZ		LOC105374304
FAM160A1		LOC105377123
GPRIN3		LOC105374976
TMEM183A		LOC107986992
HDAC9		LOC105369315
EXOC5		LOC105369477
LOC102157484		LOC107984568
LOC100737060		LOC105370655
LOC106506630		LOC101930091
LOC102157665		LOC105371153
LOC106507542		LOC107985176
LOC106508289		LOC107985634
LOC106509607		LOC105370743
LOC102165812		MICALL2
LOC100622439		LOC112268110
SNX19		LOC112268272
LOC110255532		LOC105376972
LOC110255548		LOC124900733
LOC110255759		LOC124900751
LOC110255835		LOC124901058
LOC110255851		LOC105377743
ZBTB5		LOC124901145
C12H17orf80		LOC105377905
CDK12		LOC124900216
SETD4		LOC124901463
LOC110256488		SEM1
LOC110256535		LOC124901686
LOC110256661		LOC107986819
LOC110256702		LOC124901725
ATAD1		LOC124901974
UBE3B		LOC124902297
LOC106506428		LOC107984257
LOC110257077		LOC124902518
LOC100516649		MS4A4E
LOC110257268		LOC124902797
LOC110257304		KDM2B
EXOC3		LOC124902955
LOC106506966		TUBGCP3
LOC110257820		LOC124903232
LOC110257896		LINC03117
LOC110257996		LOC105370854
LOC102161047		LOC124903539
LOC110259487		LOC124903578
LOC106509605		LOC105371307
TMEM159		LOC124904646
LOC110259922		LOC107984001
TMEM182		LOC124905213
LOC110260032		LOC124905220
LOC110260049		MIR106AHG
LOC102157437		LOC124905339
LOC110260345		LOC124905380
LOC110260373		LOC124905390
RWDD3		LOC124905394
LOC106510239		LOC124905550
LOC100514051		COL11A1
LOC102164252		LOC124905973
TXNL4B		LOC124907751
LOC110261537		LOC124906110
LOC110261584		LOC124907987
LOC110261992		LOC124906127
LOC110262225		LOC102723759
LOC102167901		CD84
LOC102159603		LOC105373485
		LOC105374942
		PLXNA4
		LOC105375860
		LOC105376704
		LOC105376710
		LOC105370772
		LOC105372709
		FAM247C
		LOC105377628
		LOC105377095
		LOC105370204
		LOC105377896
		P3H1
