# Supplementary material for: miR-191-5p suppresses PRRSV replication by targeting porcine EGFR to enhance interferon signaling
Source: Front Microbiol. 2024 Oct 14;15:1473504. doi: 10.3389/fmicb.2024.1473504 (PMC11514493; doi:10.3389/fmicb.2024.1473504)
Supplement: Supplementary file 3 [file Table_3.XLSX]

## Sheet: Sheet1
specific gene candidates in pigs	GeneRIF_papers
ACKR3	The CXCL12-CXCR4/CXCR7 axis as a mechanism of immune resistance in gastrointestinal malignancies.
LGALS8	The glycan-binding proteins of the galectin family can modulate the immune system. Anti-galectin autoantibodies thus could have functional and/or pathogenic implications in inflammatory processes and autoimmunity.
LGALS8	Galectin 1 and galectin 8 promote influenza virus binding in dose dependent manner.
LGALS8	Association of galectin-8 (F19Y) occurrence with autoimmune diseases in a Caucasian population.
LGALS8	we detected Gal-8 in human cerebrospinal fluid, suggesting a role in the CNS immune-surveillance circuit. In addition, we show that MS patients generate function-blocking anti-Gal-8 antibodies with pathogenic potential. Furthermore, circulating anti-Gal-8 antibodies associate with relapsing-remitting MS, and not with progressive MS phenotypes, predicting clinical disability at diagnosis within th…
LGALS8	Galectin-8 in the onset of the immune response and inflammation.
LGALS8	circHMGCS1-016 reshapes immune environment by sponging miR-1236-3p to regulate CD73 and GAL-8 expression in intrahepatic cholangiocarcinoma.
LGALS8	Deficiency in Galectin-3, -8, and -9 impairs immunity to chronic Mycobacterium tuberculosis infection but not acute infection with multiple intracellular pathogens.
ARRB1	Mononuclear leukocytes of patients with depression showed significantly reduced immunoreactive quantities of beta-arrestin-1
ARRB1	Results reveal that nuclear beta-arrestin1, acting as a scaffold for the dephosphorylation of STAT1, is an essential negative regulator of IFN-gamma signaling and participates in the IFN-gamma-induced cellular antiviral response.
ARRB1	Beta-Arrestin 1 modulates functions of autoimmune T cells from primary biliary cirrhosis patients.
ARRB1	Data indicate that beta-arrestin1 is dispensable for STAT1 dephosphorylation and the termination of IFNgamma signaling.
ASPH	Study demonstrates that high levels of humbug immunoreactivity in colon carcinomas correlate with histologic grade and tumor behavior, suggesting that humbug can serve as a prognostic biomarker.
ATAD1	ATAD1 inhibits hepatitis C virus infection by removing the viral TA-protein NS5B from mitochondria.
ATG2B	Polymorphism in autophagy gene ATG2B is not associated with bladder cancer recurrence after intravesical Bacillus Calmette-Guerin (BCG) immunotherapy in Asian patients.
MSI2	MSI2 expression in adrenocortical carcinoma: Association with unfavorable prognosis and correlation with steroid and immune-related pathways.
MSI2	Musashi-2 potentiates colorectal cancer immune infiltration by regulating the post-translational modifications of HMGB1 to promote DCs maturation and migration.
OXSR1	OXSR1 kinase is shown to interact with the three RELT family members RELT, RELL1, and RELL2 by in vitro co-immunoprecipitation; additionally, OXSR1 phosphorylates RELT family members in an in vitro kinase assay.
PAK3	Group I p21-activated kinases augment Tax-mediated transcriptional activation of human T-cell leukemia virus type 1 long terminal repeats in a kinase-independent manner.
PAK3	Integration of hepatitis B virus DNA into p21-activated kinase 3 (PAK3) gene in HepG2.2.15 cells.
PAK3	Integration of hepatitis B virus DNA into p21-activated kinase 3 (PAK3) gene in HepG2.2.15 cells.
PDE4A	The immunophilin AIP (XAP2/ARA9) reversibly inhibited the enzymatic activity of PDE4A5, an isoform of PDE4A.
PPARD	COX-2 immunopositivity was significantly associated with PPARbeta and PPARgamma immunoreactivity. Microvessel density was significantly higher among PPARbeta-immunoreactive squamous cell carcinomas.
PPARD	There is a direct link between type 1 IFN signaling and PPARdelta. The induction of PPARdelta by type 1 IFN contributes to the persistence of activated T cells in psoriasis skin lesions.
PPARD	The data of this study show that genetic deficiency of PPAR- delays clearance of apoptotic cells and increases autoantibody production, leading to immune complex-mediated glomerulonephritis.
PPARD	PPAR-delta serves as an important molecular brake for the control of central nervous system autoimmune inflammation.
PPARD	Rapid acceleration of KRAS-mutant pancreatic carcinogenesis via remodeling of tumor immune microenvironment by PPARdelta.
PPP3CA	Crystal structure of calcineurin-cyclophilin-cyclosporin shows common but distinct recognition of immunophilin-drug complexes.
PPP3CA	A conserved docking surface on calcineurin mediates interaction with substrates and immunosuppressants.
PPP3CA	PPP3CA down-regulation is associated with hepatocellular carcinoma infected with hepatitis C virus.
PPP3CA	Human herpesvirus 6B U54 binds the calcineurin (CaN) phosphatase enzyme, causing improper dephosphorylation and nuclear translocation of NFAT (nuclear factor of activated T cells) proteins, resulting in suboptimal IL-2 gene transcription.
PRKAG2	The authors found that the gene encoding the gamma2 subunit of AMP-activated protein kinase (AMPK) strongly correlated with Zaire Ebolavirus transduction in the tumor cell panel.
PRKCQ	Formation of a stable peripheral activation cluster of the immunological synapse is partially controlled by protein kinase C theta, confines released lytic molecules at the synaptic interface and enhances the effectiveness of target cell lysis.
PRKCQ	formation of immunological synapse(IS) induces altered signal pathways in Treg, characterized by reduced recruitment of Src kinases, PKC-theta & Carma-1 to the IS; in Treg, PKC-theta acts as a proinflammatory mediator & this effect is enhanced by TNFalpha
PRKCQ	Compared with CD117, DOG1 (using the K9 antibody) is a more specific marker, whereas PKC theta (using the clone 27 antibody) is a considerably less specific immunohistochemical marker for GIST.
PRKCQ	c-KIT, PKC-theta; and DOG-1 antigens are the most sensitive and specific immunomarkers for confirming EGISTs
PRKCQ	PRKCQ is the only T cell-expressed protein kinase C that localizes selectively to center of immunological synapse following T cell antigen stimulation; this unique localization is essential for PRKCQ-mediated downstream signaling. [REVIEW]
PRKCQ	Data suggest that protein kinase C theta (PKCtheta;) inhibition alone may be sufficient to drive efficacy in chronic autoimmune and inflammatory diseases.
PRKCQ	PKCtheta; acts through the activation of p38 MAPK and autophagy induction. PKCtheta; acts through the activation of p38 MAPK and autophagy induction to induce the Epstein-Barr virus (EBV) lytic cycle.
PRKCQ	Sumoylation of PKC-theta; was essential for T cell activation. Desumoylation did not affect the catalytic activity of PKC-theta; but inhibited the association of CD28 with PKC-theta; and filamin A and impaired the assembly of a mature immunological synapse.
PRKCQ	Data suggest that, in T-lymphocytes, nitric oxide generated by eNOS S-nitrosylates Cys374 on ACTB and thus regulates activation/recruitment of PRKCQ at immune synapse; S-nitrosylation of beta-actin impairs actin binding to PFN1 and regulates protein transport in lamellipodia. (eNOS = nitric oxide synthase 3; ACTB = beta-actin; PRKCQ = protein kinase C-theta; PFN1 = profilin-1)
PRKCQ	These findings demonstrate that PKCtheta; plays an important role in a positive feedback regulatory loop that modulates TCR-proximal signaling and, moreover, provide a mechanistic explanation for earlier reports that documented an important role for PKCtheta; in T cell Ca(2+) signaling. This PKCtheta;-Zap70 interaction could potentially serve as a promising and highly selective immunosuppressive …
BFAR	BFAR coordinates TGFbeta signaling to modulate Th9-mediated cancer immunotherapy.
RAB29	Rab29 is a regulator of receptor recycling and this GTPase is a shared participant in immune synapse and primary cilium assembly.
RBMS3	Disruption of RBMS3 suppresses PD-L1 and enhances antitumor immune activities and therapeutic effects of auranofin against triple-negative breast cancer.
RBPJ	regulates Kaposi's sarcoma-associated herpesvirus (KSHV) K14/vGPCR transcripts; this suggests the possibility that other modulators of Notch signaling might be able to induce expression of this RNA outside the context of lytic KSHV replication.
RBPJ	findings show that induction of FcRH5 by Epstein-Barr virus nuclear antigen 2 is strictly CBF1 dependent
RBPJ	RTA activates the Kaposi's sarcoma-associated herpesvirus K8 promoter through an indirect binding mechanism, i.e. being recruited to the K8 promoter through interaction with RBP-Jkappa bound to an RBP-Jkappa motif in the promoter
RBPJ	The interactions of RBPJ with ORF47 and ORF50 human herpesvirus 8 proteins in transactivation are reported.
RBPJ	DNA binding and tetramerization mutants of Rta fail to stimulate RBP-Jk binding to Kaposi's sarcoma-associated herpesvirus DNA.
RBPJ	Authors report that human papillomavirus type 8 E6 subverts NOTCH activation during keratinocyte differentiation by inhibiting RBPJ/MAML1 transcriptional activator complexes at NOTCH target DNA.
RBPJ	CBF1/CSL acts as a global hub which is used by the virus to coordinate the lytic cascade.
RBPJ	Data suggest that, in B-lymphocytes infected with Epstein-Barr virus (EBV), EBNA3A (EBV nuclear antigen 3A) binds to CBF1-occupied intergenic enhancers located between CXCL10 and CXCL9 and displaces the transactivator EBNA2.
RBPJ	Notch signaling through recombination signal binding protein for immunoglobulin kappa J region (RBPJ) controls both ovarian progesterone receptor and glucose transporter SLC2A1 expression during decidualization
S1PR5	Edg-5 receptor in brain endothelial cells contributes to optimal barrier formation and maintenance of immune quiescence of the barrier endothelium.
SATB2	SATB2 immunostaining could potentially be a useful adjunct for assisting in the differential diagnosis of both benign and malignant osteogenic tumors and for colorectal adenocarcinomas
SATB2	Although SATB2 immunoexpression helps to distinguish osteosarcoma from their mimickers, the identification of malignant osteoid matrix formation and the integration of clinical and radiological data remain the corner stone of osteosarcoma diagnosis and as yet no antibody has equalled the diagnostic value of this important morphologic hallmark.
SATB2	Indicate that beta-catenin and SATB2 are useful immunohistochemical markers for differentiating between pulmonary enteric adenocarcinoma and metastatic colorectal carcinoma.
SATB2	SATB2 immunohistochemistry is not useful in supporting urothelial versus gastrointestinal or endocervical origin in the differential diagnosis of glandular lesions of the bladder/urinary tract.
SATB2	SATB2 is a relatively specific immunohistochemistry marker for both metastatic and primary signet ring cell carcinomas of lower GI tract origin.
SATB2	SATB2 and CDX2-negative immunohistochemical expression is associated with reduced diseasespecific and disease-free survival in patients with mismatch repair protein deficient colonic adenocarcinomas.
SNX8	SNX8 mediates IFNG-triggered non-canonical signaling pathway and host defense against Listeria monocytogenes.
SREBF1	hepatitis C virus core protein enhanced the transcriptional activity of SREBP1
SREBF1	SREBF1 protein expression was evaluated in 54 hepatocellular carcinoma samples by immunohistochemistry, and Kaplan-Meier survival analysis indicated that SREBF1-high hepatocellular carcinoma correlated with high mortality.
SREBF1	The results showed that the level of mature SREBP-1 was enhanced by genotype 3a hepatitis c virus core protein after transient expression.
SREBF1	Data show that a natural mutant of hepatitis B virus X gene (termed HBxDelta127) has a greater capacity to stimulate SREBP-1c, relative to wild type HBx, in the promotion of hepatoma cell growth.
SREBF1	Coxsackievirus B3 infection induces apoptosis through downregulation of p58IPK and activation of CHOP and SREBP1.
SREBF1	Coxsackievirus B3 infection induces apoptosis through downregulation of p58IPK and activation of CHOP and SREBP1.
SREBF1	Human cytomegalovirus infection induces adipocyte-like lipogenesis through activation of SREBP1.
SREBF1	Akt1 and Akt2 activated both SREBP-1 and SREBP-2, whereas Akt3 upregulated SREBP-1 to enhance hepatitis C virus translation.
SREBF1	Results show that CVB3 2A protein promoted the transcriptional activities of SREBP1a, which are mediated by the SP1 transcription factor. Also, MEK/ERK signaling pathway is critical for 2A-induced SREBP1a activation and lipid accumulation. SREBP1 promoted lipid accumulation and CVB3 virus replication.
TBC1D15	IFNB/interferon-beta regulates autophagy via a MIR1-TBC1D15-RAB7 pathway.
TBL1X	We localized proteins encoded by the top two regulated genes, TBL1X and USH1C, using immunohistochemistry to placental stem and anchoring villi associated with active contractile function.
TBPL1	Western blotting and immunohistochemistry both indicated a higher TBPL1 protein expression level in colorectal cancer tissue. siRNA for TBPL1 transfection obviously slowed down the cell proliferation in both SW-620 and HT-29 cells.
TRPS1	Clinical significance and biological function of transcriptional repressor GATA binding 1 in gastric cancer: a study based on data mining, RT-qPCR, immunochemistry, and vitro experiment.
TRPS1	The diagnostic utility of trichorhinophalangeal syndrome type 1 immunohistochemistry for metastatic breast carcinoma in effusion cytology specimens.
TRPS1	The diagnostic utility of trichorhinophalangeal syndrome type 1 immunohistochemistry for metastatic breast carcinoma in effusion cytology specimens.
USP1	Coimmunoprecipitation experiments indicated that human papillomavirus type 31 E1 assembles into a ternary complex with UAF1 and any one of these three USPs: USP1, USP12 and USP46.
USP1	In this report, the authors provide evidence that the previously described interaction between the viral E1 helicase and the cellular UAF1-USP1 deubiquitinating enzyme complex is required for the completion of the bidirectional theta replication of the human papilloma virus type 11 genome and the subsequent initiation of the unidirectional replication.
WASF3	we show that WASF3 is present in the HER2 immunocomplex and suppression of WASF3 function leads to suppression of invasion even in the presence of HER2 expression.The engagement of WASF3 with the HER2/HER3 complex facilitates its phospho-activation and transcriptional upregulation, which is facilitated by HER2/HER3 activation of JAK/STAT signaling.
WWOX	comprehensive analysis of WWOX protein expression in normal tissues was performed by means of immunohistochemistry
WWOX	Loss of WWOX immunoexpression in patients with urinary bladder tumors strongly correlates with classical clinicopathological factors and appears to be a potential predictive marker of progressive disease.
WWOX	WOX1 is involved in MMP9 induction, suggesting a novel role of WOX1 in Epstein-Barr virus-associated cancer progression
WWOX	loss of WWOX expression not only resulted in glioma carcinogenesis, but also suppressed immune cell attack by inducing Fas/FasL mediated apoptotic signaling.
WWOX	Hypermethylation of WWOX gene is associated with Epstein-Barr virus-associated gastric carcinomas.
WWOX	Hypermethylation of WWOX gene is associated with Epstein-Barr virus-associated gastric carcinomas.
YIPF4	YIPF4 is a binding partner of the papillomavirus E5 proteins.
ZBTB16	Promyelocytic leukemia zinc finger controls type 2 immune responses in the lungs by regulating lineage commitment and the function of innate and adaptive immune cells.
CAMKK2	These results suggest that CaMKK is an important factor for human cytomegalovirus replication and human cytomegalovirus-mediated glycolytic activation.
CAMKK2	Neuronal CaMKK2 promotes immunosuppression and checkpoint blockade resistance in glioblastoma.
ZBTB4	Identification of ZBTB4 as an immunological biomarker that can inhibit the proliferation and invasion of pancreatic cancer.
ZHX2	Expression of a constitutively active Raf transgene enhances lymphoproliferation, indicating a role for the Ras-MAPK pathway in linker for activation of T cells (LAT)-mediated autoimmune hyperproliferation.
ZHX2	Remarkably, ZHX2 significantly decreased hepatitis B virus antigen expression, pregenomic RNA (pgRNA) and hepatitis B virus core particle DNA production both in vitro and in mouse livers supporting.
ZHX2	Upregulation of ZHX2 predicts poor prognosis and is correlated with immune infiltration in gastric cancer.
ZHX2	Transcription factor Zhx2 restricts NK cell maturation and suppresses their antitumor immunity.
ADARB1	overexpression inhibits HDV RNA replication and compromises virus viability
ADARB1	short inhibitory RNA-mediated knockdown of host ADAR1 expression but not that of ADAR2 led to decreased HDV amber/W editing and virus production
ADARB1	short inhibitory RNA-mediated knockdown of host ADAR1 expression but not that of ADAR2 led to decreased HDV amber/W editing and virus production
ADARB1	Reference values of serum adenosine deaminase (ADA) in normal pregnancy may provide important database for making clinical decisions in pregnancies complicated by conditions where cellular immunity has been altered.
ADARB1	This study investigates the genome-wide binding preferences of the nuclear constitutive isoforms ADAR1-p110 and ADAR2 on human miRNA species by RNA immunoprecipitation of ADAR-bound small RNAs .
CDC7	the immunohistochemical results and The Cancer Genome Atlas (TCGA) database revealed that CDC7 was significantly upregulated in lung adenocarcinoma tissues, suggesting that miR888 may function as an oncogene in the progression of lung adenocarcinoma patients, and the miR888/CDC7 axis was not the dominant pathway for CDC7 regulation in patients with lung adenocarcinoma
CDKN1B	P21Waf1 immunoreactivity is higher in male breast cancers compared with female breast cancers.
CDKN1B	Prolonged adenovirus-mediated expression of p27(Kip1) down-regulates integrin alphav beta5 expression on t(2;5)-anaplastic large cell lymphoma cells.
CDKN1B	stability of p27(Kip1) by hepatitis C virus core is associated with blocking activated T cells for the G(1) to S phase transition and inhibiting T cell proliferation
CDKN1B	Adenovirus-p27kip1 can inhibit the growth and multiplication of esophageal carcinoma cells and induce apoptosis.
CDKN1B	regulated by Epstein-Barr virus nuclear antigen 3C (EBNA3c) during primary B cell transformation
CDKN1B	p27Kip1 inhibits hTERT mRNA expression and telomerase activity through post-transcriptional up-regulation by IFN-gamma/IRF-1 signaling
CDKN1B	We immunohistochemically analyzed the expression of p21, p27, p14, p16, p53 and proliferation marker Ki67, in 67 low and high grade astrocytic tumors
CDKN1B	The expression of Skp2 and p27 proteins in 48 cases of Extranodal nasal-type natural killer cell lymphoma was studied and their correlations with Epstein-Barr virus status and clinical outcomes, was evaluated.
CDKN1B	The expression of Skp2 and p27 proteins in 48 cases of Extranodal nasal-type natural killer cell lymphoma was studied and their correlations with Epstein-Barr virus status and clinical outcomes, was evaluated.
CDKN1B	the analysis of p21cip1, p27kip1, and p16INk4a by immunohistochemistry could be useful in the management of patients with papillary thyroid carcinoma
CDKN1B	Antitumor bioactivity of adenovirus-mediated p27mt in colorectal cancer cell line SW480.
CDKN1B	reduced immunostaining of PCNA and Ki67 and increased immunostaining of p27 and p57 in the dexamethasone-induced intrauterine growth restriction placental development compared to control placental development
CDKN1B	FoxM1, p27(kip1) and p21(waf1/cip1) showed distinct immunoreactivity according to histological subtype, which may help in the differential diagnosis of pulmonary neuroendocrine tumours.
CDKN1B	p27 and galectin-3 immunohistochemical results were significantly different between follicular adenomas including those with atypical features and minimally and widely invasive follicular carcinomas with highly statistically significant difference
CDKN1B	Data indicate there was no statistical significance observed between the immunoexpression of p16, p21, p27, and pRb with nodal metastasis, depth of invasion, and presence of vascular or perineural invasion.
CDKN1B	Kaposi's sarcoma-associated herpesvirus Rta induces cell cycle arrest in G0/G1 phase by stabilizing and promoting nuclear localization of p27kip.
CDKN1B	Studied the prognostic value of Ki-67, p27, and p53 immunoreactivity in human gastric cancer.
CDKN1B	SIRT1-mediated downregulation of p27Kip1 is essential for overcoming contact inhibition of Kaposi's sarcoma-associated herpesvirus transformed cells
CDKN1B	MUC-1, CK7, and c-p27 immunostaining can be used as the predictive markers for esophageal cancer progression from Barrett's esophagus.
CIAPIN1	Knock down of CIAPIN1 by adenovirus-delivered siRNA may be a potential therapeutic strategy for treatment of hepatocellular carcinoma in which CIAPIN1 is overexpressed.
CIAPIN1	Results of immunohistochemical study showed that CIAPIN1 might play an important role in esophageal carcinogenesis, and it could be considered as a prognostic indicator in esophageal squamous cell carcinoma.
CIAPIN1	Results of immunohistochemical study showed that CIAPIN1 might play an important role in esophageal carcinogenesis, and it could be considered as a prognostic indicator in esophageal squamous cell carcinoma.
CIAPIN1	lentivirus-vector-mediated RNAi targeting of CIAPIN1 is a potential approach to reverse MDR of breast cancer and CIAPIN1 may participate in MDR of breast cancer by regulating P-glycoprotein and P53 expression.
CXXC4	CXXC finger protein 4 inhibits the CDK18-ERK1/2 axis to suppress the immune escape of gastric cancer cells with involvement of ELK1/MIR100HG pathway.
DCUN1D5	evidence that DCNL5 may be involved in innate immunity, as it is a direct substrate of the kinase IKKalpha during immune signalling.
AK2	Adenylate kinase 2 is a biomarker related to the prognosis of glioma and the immune microenvironment.
DLX1	DLX1 acts as a novel prognostic biomarker involved in immune cell infiltration and tumor progression in lung adenocarcinoma.
DLX1	DLX1 acts as a novel prognostic biomarker involved in immune cell infiltration and tumor progression in lung adenocarcinoma.
DMD	Systemic Duchenne muscular dystrophy gene therapy has come a long way. Progresses in the fields of virology, immunology, dystrophin biology, animal models, and large-scale clinical grade
DMD	Low dystrophin variability between muscles and stable expression over time in Becker muscular dystrophy using capillary Western immunoassay.
DMD	Dystrophin and metalloproteinase 9 in myocardial ischemia: A post-mortem immunohistochemical study.
EGFR	findings suggest an increase in functional TGF-alpha and activation of the EGFr in response to IFN-gamma
EGFR	Human cytomegalovirus infection inhibits epidermal growth factor (EGF) signalling by targeting EGF receptors
EGFR	Infection of primary cells with adenoviruses carrying the relevant point mutations confirmed the crucial role of putative YXX Phi and dileucine (LL) transport motifs within Ad2 10.4-14.5 for down-regulation of Fas, TRAIL-R1, TRAIL-R2, and EGFR.
EGFR	lysosomal degradation by adenovirus E3 RIDalpha protein dependent on specific domains
EGFR	CaM co-immunoprecipitates with EGF-activated and non-activated receptors
EGFR	Upregulation of leucine-rich repeats and immunoglobulin-like domains 1 is followed by enhanced ubiquitylation and degradation of EGFR
EGFR	decreased EGF receptor tyrosine phosphorylation and aberrant recruitment of the adaptor proteins ShcA and Grb2 to the EGF receptor in cells harbouring the hepatitis C virus subgenomic replicon
EGFR	decreased EGF receptor tyrosine phosphorylation and aberrant recruitment of the adaptor proteins ShcA and Grb2 to the EGF receptor in cells harbouring the hepatitis C virus subgenomic replicon
EGFR	EGFR signaling has a role in regulating host defense and immune response by tightly controlling TLR2 induction during bacterial infections
EGFR	data suggest that the EGFR immunopositivity can be considered as reliable predictors of disease stage in urine ThinPrep (TP) specimens.
EGFR	These data demonstrate that sterile wounding initiates an innate immune response through activation of the epidermal growth factor receptor that increases resistance to overt infection and microbial colonization.
EGFR	Immunohistochemical analysis was performed with antibodies to VEGF, EGFR, MMP-2, and COX-2 in relation to human papilloma viral load and persistence of human papillomavirus after conization with negative margins
EGFR	This study is the first to demonstrate that EGFR is implicated in IFNgamma-dependent signaling pathways.
EGFR	Comparative genomic hybridization and immunohistochemical assessment of EGFR, PTEN, p53, and MIB-1 expression in 13 oligodendrogliomas, one oligoastrocytoma and 23 high-grade astrocytomas is reported.
EGFR	Significant increases in EGFR copy number and EGFR immunoreactivity were found in areca-associated oral squamous cell carcinoma subjects
EGFR	Fluorescence in situ hybridization/immunohistochemistry analysis of EGFR may be a useful ancillary tool to classify difficult cytology cases and inform clinicians arranging targeted chemotherapy.
EGFR	study investigated EGFR protein expression & gene mutations in exons 18, 19 and 21 in 40 renal angiomyolipomas (AML); no EGFR gene mutations of TK domain were detected and strong immunostaining was found in 5% of the renal AML cases
EGFR	EGFR immunoreactivity with basal cytoplasmic pattern was exclusively seen in terminal respiratory unit type lung adenocarcinoma and a subset of these cases was seen with EGFR mutations in the responders to EGFR inhibitor therapy
EGFR	The epidermal growth factor-receptor (EGF-R) is a receptor tyrosine kinase of the ErbB family. The increased immunoreactivity of EGF was detected in serous-mucinous adenocarcinoma of the ovary.
EGFR	This study demonstrates that ADV-Avi/biotin-PEG-EGF construct systems can be applied for cell-specific delivery of ADV with simultaneously reducing innate immune responses.
EGFR	study found that EGFR high gene copy number and activating mutations in lung adenocarcinomas are not consistently accompanied by positivity for EGFR protein by immunohistochemistry
EGFR	Epidermal growth factor receptor signaling to Erk1/2 and STATs control the intensity of the epithelial inflammatory responses to rhinovirus infection.
EGFR	Delivery of gemcitabine to tumor cells can be improved by using EGF receptor-targeted immunoliposomes.
EGFR	EGFR immunoreactivity significantly correlates with worse prognosis in patients with triple-negative Invasive ductal carcinomas
EGFR	Data show that EGFR was expressed more frequently in metastatic and primary tumour tissues as revealed by immunohistochemistry.
EGFR	Human eccrine sweat glands express CK7, CK8, CK14, CK18, CK19, CEA, EMA, Ki67, p63, EGF and EGFR. In skin, CEA can be used as a specific immunological marker of sweat glands.
EGFR	Taken together, these data provide direct evidence of the dependence of IFNgamma-induced EGFR transactivation upon EFDR receptor expression level in epithelial cells.
EGFR	For urine cytology, immunostaining method with epidermal growth factor receptor and p53 was useful for the differential diagnosis.
EGFR	The thyroid tumor was focally positive for EGFR (immunostaining) and two point mutations were identified, one on exon 18 and one on exon 20 in the tyrosine kinase (TK) domain.
EGFR	The authors show that virus infection results in the profound upregulation of Wilms' Tumour 1 (WT1) protein, a transcription factor associated with the negative regulation of a number of growth factors and growth factor receptors, including EGFR.
EGFR	Tetraspanins are co-immunoprecipitated with EGFR in both A431 and KB cells, indicating that TSPs are closely associated with EGFR.
EGFR	These findings confirmed the importance of EGFR immunoexpression rate as well as IL-6 and TNFalpha secretion by peripheral blood mononuclear cells as potential biomarkers for assessing the aggressive tumor phenotype in laryngeal carcinoma.
EGFR	The majority of chordomas express EGFR immunohistochemically but only about one-forth show alterations of the EGFR gene.
EGFR	EGFR plays an essential role in the immunopathobiology of HCMV by mediating viral entry into monocytes and stimulating the aberrant biological activity that promotes hematogenous dissemination.
EGFR	Human cytomegalovirus engages the epidermal growth factor receptor to facilitate upregulation of myeloid cell leukemia sequence (Mcl)-1 and acquisition of the apoptotic resistant phenotype in infected monocytes.
EGFR	This is the first study to show that DJ-1 immunoreactivity is present, and robust, in most glioblastomas (GBMs), and that DJ-1 staining intensity in GBMs varies directly with p53 nuclear immunoreactivity and inversely with EGFR amplification.
EGFR	This is the first study to show that DJ-1 immunoreactivity is present, and robust, in most glioblastomas (GBMs), and that DJ-1 staining intensity in GBMs varies directly with p53 nuclear immunoreactivity and inversely with EGFR amplification.
EGFR	This is the first study to show that DJ-1 immunoreactivity is present, and robust, in most glioblastomas (GBMs), and that DJ-1 staining intensity in GBMs varies directly with p53 nuclear immunoreactivity and inversely with EGFR amplification.
EGFR	This research was carried out to determine if conjunctival squamous cell carcinoma harbors human papillomavirus DNA and is associated with activation of the EGFR signaling pathway.
EGFR	This research was carried out to determine if conjunctival squamous cell carcinoma harbors human papillomavirus DNA and is associated with activation of the EGFR signaling pathway.
EGFR	Rhinovirus induced MUC5AC in bronchial epithelial cells in vitro by activating an epidermal growth factor receptor-dependent cascade culminating in specificity protein-1 transactivation of the MUC5AC promoter.
EGFR	Rhinovirus induced MUC5AC in bronchial epithelial cells in vitro by activating an epidermal growth factor receptor-dependent cascade culminating in specificity protein-1 transactivation of the MUC5AC promoter.
EGFR	ErbB-1 shows absent immunoreactivity in meningioma and indicates a level similar to that of ErbB-1 in normal peripheral nerve.
EGFR	ErbB-1 shows absent immunoreactivity in meningioma and indicates a level similar to that of ErbB-1 in normal peripheral nerve.
EGFR	A strong positive correlation between EGFR amplification and EGFR overexpression and a negative association of EGFR amplification and EGFR overexpression with p53 immunopositivity was observed.
EGFR	Enterovirus 71 induces integrin beta1/EGFR-Rac1-dependent oxidative stress in SK-N-SH cells. Up-regulation of HO-1 exerts as a host cellular defense mechanism against EV71 infection in SK-N-SH cells.
EGFR	The density of microvascularization was assessed using CD34 monoclonal antibody (hot spot technique), the expression of angiogenic factors VEGFR, EGFR and COX-2 were determined in tumor biopsies by specific immunohistochemistry techniques
EGFR	PDGFR-beta- and EGFR-immunoreactivity of pulmonary vessels distinguishes pulmonary arterial hypertension patients from controls
EGFR	Data suggest that sustained inhibition of both EGFR and ERK1/2 leads to significant protection of the cells from IFNgamma-induced apoptosis, indicating important roles for the EGFR tyrosine kinase and ERK1/2 MAP-kinases in regulating A431 cell death.
EGFR	Prospective EGFR immunohistochemistry analysis in an adult cohort comprising 750 infiltrative gliomas, is described.
EGFR	the assessment of EGFR expression in colorectal cancer by conventional immunohistochemistry has not proven its predictive value and can not be useful to predict about outcome of patients
EGFR	High-level EGFR immunohistochemical expression correlated with and predicted EGFR amplification in basal-like carcinoma of the breast.
EGFR	High-level EGFR immunohistochemical expression correlated with and predicted EGFR amplification in basal-like carcinoma of the breast.
EGFR	EGFR immunohistochemistry is not a suitable criterion for reliably selecting patients for anti-EGFR treatment. EGFR in situ hybridization may be reliably performed with high accuracy, allowing treatment decisions for lung cancer.
EGFR	EGFR expressed on head and neck squamous cell carcinoma cells induces a specific immune response in vivo.
EGFR	Inhibition of the EGFR expression prevents immortalization of human cervical cells by Human Papillomavirus type 16.
EGFR	EGFR expression in tissue microarrays of 240 breast cancer patients was detected by quantum dot-immunohistochemistry and spectral analysis. The prognostic value of EGFR immunofluorescence area for five-year recurrence-free survival was investigated.
EGFR	The assessment of p16, EGFR, and COX-2 allows to an integrative approach for the progression of squamous intraepithelial lesion, associated or not with the human papilloma virus infection.
EGFR	High serum EGFR is associated with virus infection in liver carcinogenesis.
EGFR	results suggest that oncolytic adenovirus induces autophagic cell death through an E2F1-miR-7-EGFR pathway in human cancer cells, providing a novel insight into the molecular mechanism of an anticancer virotherapy
EGFR	Chromatin immunoprecipitation (ChIP) and promoter analysis revealed that the EGFR promoter gets occupied by transcriptionally active beta-catenin when elevated in GSK3beta-inactivated cells
EGFR	Effusion immunocytochemistry could be introduced into clinical practice to identify more NSCLC patients likely to have benefit from first-line TKI treatment, especially for those without adequate tissue for molecular-based EGFR analysis.
EGFR	The combined effects of EGFR downregulation, ligand competition, and immune effector function conspire to inhibit tumor growth in xenograft models of cetuximab-resistant BRAF and KRAS mutant cancers.
EGFR	data demonstrate that EGFR internalization is critical for hepatitis C virus entry and identify a hitherto-unknown association between CD81 and EGFR
EGFR	None of the cases was immunopositive for IDH1 and EGFR. p53 protein expression was observed in three cases with 25-30 % of cells showing weak to moderate staining.
EGFR	Membranes and cytoplasm of the tumor cells showed variable EGFR staining intensities with a range of immunopositive cancer cells from 0% to 100%
EGFR	Phospho-Akt immunoreactivity in prostate cancer shows a relationship to disease severity and outcome, Ki67 and phosphorylated EGFR expression
EGFR	Patients with concomitant IGF1R/EGFR fluorescence in situ hybridization immunohistochemistry had a worse disease-free survival and overall survival
EGFR	Patients with concomitant IGF1R/EGFR fluorescence in situ hybridization immunohistochemistry had a worse disease-free survival and overall survival
EGFR	Report mutation-specific immunohistochemistry, using optimized procedures, as a reliable prescreening test for detecting EGFR mutations in lung adenocarcinoma.
EGFR	Association of epidermal growth factor and epidermal growth factor receptor polymorphisms with the risk of hepatitis B virus-related hepatocellular carcinoma in the population of North China.
EGFR	In preclinical studies, the D2C7-(scdsFv)-PE38KDEL immunotoxin exhibited significant potential for treating brain tumors expressing EGFRwt, EGFRvIII, or both.
EGFR	The results obtained through routine analysis of more than 1,300 samples indicated that all types of specimen can be analyzed without any significant bias. TTF-1 immunostaining may be used to predict negative EGFR mutation status.
EGFR	results highlight the importance of EGFR signaling in maintaining skin immune homeostasis and identify a macrophage contribution to a serious adverse consequence of cancer chemotherapy
EGFR	We report that respiratory virus-induced EGFR activation suppresses endogenous airway epithelial antiviral signaling.
EGFR	immunohistochemical EGFR expression appears to be a common feature of penile carcinomas, independently of histologic subtype, histologic grade, and human papillomavirus presence.
EGFR	findings show that autochthonous EGFR-driven lung tumors inhibit antitumor immunity by activating the PD-1/PD-L1 pathway to suppress T-cell function and increase proinflammatory cytokines; these findings indicate EGFR functions as an oncogene through non-cell-autonomous mechanisms
EGFR	HLA-A*0201-restricted T cell epitopes derived from the EGFR T790M mutation have been identified and can be used for immunotherapy to reverse the EGFR T790M-mediated drug resistance.
EGFR	Binding of the HSV-1 envelope initiates the epidermal growth factor receptor EGFR-PI3K signaling pathway, which leads to virus-induced early cofilin phosphorylation and F-actin polymerization.
EGFR	hot spot mutations are associates with Merkel cell polyomavirus infection
EGFR	Our results suggest that immunohistochemical analysis with mutation-specific antibodies is a promising approach for quantifying EGFR mutations, and may predict the effect of EGFR-TKI treatment for EGFR mutation-positive NSCLC.
EGFR	High versus low EGFR expression analyzed by immunohistochemical staining in cancer cells was not significantly associated with overall survival or recurrence-free survival.
EGFR	IFNgamma and TNFalpha induced the phosphorylation of EGFR and the following phosphorylation of ERK, which is partly responsible for the suppressive effect of IFNgamma on TNFalpha-induced production of CTACK/CCL27.
EGFR	Graphene nanoribbons elicit cell specific uptake and delivery via activation of epidermal growth factor receptor enhanced by human papillomavirus E5 protein.
EGFR	These results suggest that miR-27a may have antiviral activity against enterovirus 71 by inhibiting EGFR.
EGFR	immunohistochemistry with the novel mutation-specific antibody could be used as a screening method to assess the EGFR L858R mutation status in primary lung adenocarcinoma.
EGFR	This finding suggests that the EGFR T790M mutation-derived antigen could be a new target for cancer immunotherapy.
EGFR	CREB silencing using RNA interference reduced basal levels of BCRP mRNA and diminished the induction of BCRP by EGF. Chromatin immunoprecipitation assays confirmed that a putative CRE site on the BCRP promoter bound p-CREB by a point mutation
EGFR	IFI6 inhibits HCV entry by impairing EGFR mediated CD81/CLDN1 interactions. This may be relevant to other virus entry processes employing EGFR.
EGFR	Report bio-ferrography immunomagnetic isolation procedure for the separation of EGFR high positive circulating tumor cells.
EGFR	Proton-pump positive parietal cells were mostly EGFR immunoreactive whereas very few pepsinogen I (PGI)-positive chief cells were EGFR positive.
EGFR	EGFR expression was studied by immunohistochemistry and EGFR mutations (exons 18-24) by PCR cloning and sequencing.
EGFR	Compared with other predominant subtypes with EGFR mutations, the microenvironment of SPA with EGFR mutations is characterized by cancer cells with higher invasive and immune evasion potential and more abundant stromal cells with tumor-promoting functions, which would contribute to the more aggressive behavior of SPA.
EGFR	Our data imply that at sites of tissue damage, when inflammatory mediators are present, for example in lungs of COPD patients, MSCs become more potent inducers of repair, in addition to their well-known immune-modulatory properties.
EGFR	while transcript and protein levels of EGFR and ErbB2 were up-regulated or unaffected, respectively, hepatitis c virus induced a substantial reduction of ErbB3 and ErbB4 expression.
EGFR	while transcript and protein levels of EGFR and ErbB2 were up-regulated or unaffected, respectively, hepatitis c virus induced a substantial reduction of ErbB3 and ErbB4 expression.
EGFR	Netrin-1 enhanced infectivity of hepatitis C virus particles and promoted viral entry by increasing the activation and decreasing the recycling of EGFR.
EGFR	EGFR and VEGF immunoexpression was superior for squamous cell carcinomas, compared to basal cell carcinomas. Regarding squamous cell carcinomas, the immunoexpression of these two markers was superior in moderate/poor differentiated forms, compared to well differentiated forms.
EGFR	Here the authors show that suppressor of cytokine signaling (SOCS) five has a pivotal role in restricting influenza A virus in the airway epithelium, through the regulation of epidermal growth factor receptor (EGFR).
EGFR	photoimmunotherapy (PIT) is a new targeted treatment for bladder cancer. Panitumumab-IR700-induced PIT selectively kills EGFR-expressing bladder cancer cells in vitro and in vivo and therefore warrants further therapeutic studies in orthotopic xenografts of bladder cancer and ultimately in patients
EGFR	provides definitive evidence that sustained activation of EGFR in proximal epithelia is sufficient to cause spontaneous, progressive renal tubulointerstitial fibrosis, evident by epithelial dedifferentiation, increased myofibroblasts, immune cell infiltration, and increased matrix deposition
EGFR	Studies suggest that the routine clinical use of fluorescence in situ hybridization (FISH) and immunocytochemistry (ICC) may be replaced by emerging next-generation sequencing and digital, color-coded barcode technologies, which have the advantage of simultaneously evaluating anaplastic lymphoma kinase (ALK) and c-ros oncogene 1 (ROS1) and epidermal growth factor receptor (EGFR) alterations in a …
EGFR	Osimertinib reduces PD-L1 mRNA expression and induces its protein degradation, suggesting that osimertinib may reactivate the immune activity of T cells in the tumor microenvironment in EGFR-mutated NSCLC patients.
EGFR	Among 100 mAbs, only one clone EMab-51 (IgG1, kappa) reacted with EGFR in Western blot analysis. Finally, immunohistochemical analyses with EMab-51 showed sensitive and specific reactions against oral cancer cells, warranting the use of EMab-51 to detect EGFR in pathological analyses of EGFR-expressing cancers
EGFR	Lentivirus mediated ADAM17 RNAi may reverse the acquired resistance of lung adenocarcinoma to gefitinib via inhibiting the upstream of EGFR signal pathway, which may provide a new therapeutic target to solve the acquired resistance to EGFR tyrosine kinase inhibitors in lung adenocarcinoma
EGFR	these results suggest a mechanism for EGFR inhibition to suppress respiratory syncytial virus by activation of endogenous epithelial antiviral defenses
EGFR	In this study, authors analyzed the immunoexpression of EGFR, HER2 (EGFR2) and HER3 (EGFR3) in 41 cases of serous borderline ovarian tumors and carcinomas, in relation to the degree of differentiation and tumor stage.
EGFR	These studies demonstrate a requirement for human herpesvirus 5 pUL135 interactions with Abi-1 and CIN85 for regulation of EGFR and mechanistically link the regulation of EGFR to virus reactivation.
EGFR	EGFR may be involved in immune evasion, possibly through regulation of B7H5 expression in nonsmall cell lung carcinoma.
EGFR	This study demonstrated the significance of hscFv as a potential immunotherapeutic agent as well as a targeting agent for specific delivery of drugs to EGFRvIII expressing cancer cells.
EGFR	The molecular mechanism behind EGFR-mutant patients showing unfavorable responses to immune checkpoint inhibitors.
EGFR	The highly specific targeted property of (188)Re-cetuximab suggested that it is suitable as a diagnostic tool and maybe a potent radioimmunotherapy agent in EGFR-positive cancers
EGFR	Investigated the role of epidermal growth factor receptor(EGFR) in mediating hepatitis B virus-sodium taurocholate cotransporting polypeptide(HBV-NTCP) internalization into susceptible cells. Results show EGFR acts a link from cell-surface HBV-NTCP attachment to viral invasion beyond the host cell membrane.
EGFR	Investigated the role of epidermal growth factor receptor(EGFR) in mediating hepatitis B virus-sodium taurocholate cotransporting polypeptide(HBV-NTCP) internalization into susceptible cells. Results show EGFR acts a link from cell-surface HBV-NTCP attachment to viral invasion beyond the host cell membrane.
EGFR	Compared with 212 EGFR wild-type non-small-cell lung cancer (NSCLC), outcomes with programmed cell death 1 or programmed death-ligand 1 (PD-(L)1) blockade were worse in patients with NSCLC harboring alterations in exon 19 of EGFR (EGFRDelta19) but similar for EGFRL858R NSCLC. EGFRT790M status and PD-L1 expression did not impact response or survival outcomes to immune checkpoint blockade.
EGFR	We find that the proteinase ADAM17 activates the extracellular signal-regulated kinases (ERK1/2) pathway by the shedding of growth factors which triggers the formation of an endocytic entry platform. Infectious endocytic entry platforms carrying virus particles consist of two-fold larger CD151 domains containing the EGFR. Our finding clearly dissects initial virus binding from ADAM17-dependent as…
EGFR	The papillomavirus E5 gene does not affect EGFR transcription and overall survival in cervical cancer.
EGFR	EGFR expression is significantly higher in human papilloma virus positive inverted papilloma. Stathmin is expressed by all IP tumour cells. Stathmin was also associated with dysplasia.
EGFR	These findings suggest that Del19 mutations of EGFR, with an estimated frequency of 40% in Chinese lung adenocarcinoma patients, may serve as unique targets for immunotherapy in Chinese lung cancer patients.
EGFR	Low-risk human papillomavirus positivity is mutually exclusive with EGFR mutations in sinonasal inverted papilloma, which suggests alternate mechanisms of pathogenesis.
EGFR	Low-risk human papillomavirus positivity is mutually exclusive with EGFR mutations in sinonasal inverted papilloma, which suggests alternate mechanisms of pathogenesis.
EGFR	This study demonstrated that EGFR mutations are frequent in resectable lung cancer and contribute to the long-term survival outcomes of lung adenocarcinoma (LUAD) patients. The levels of tumor immune cell infiltrates in LUAD and lung squamous carcinoma differed and, in part, were significantly related to EGFR expression.
EGFR	Epidermal growth factor receptor (EGFR) mutation leads to an up-regulation of immune response related pathways and dismal prognosis in lower-grade glioma. Infiltration of CD4+ T cells, neutrophils, macrophages, and dendritic cells is increased in EGFR-mutant cases. Infiltration of specific types of immune cells is correlated with shorter survival time.
EGFR	The machinery for endocytosis of epidermal growth factor receptor coordinates the transport of incoming hepatitis B virus to the endosomal network.
EGFR	EGFR E746-A750 deletion in lung cancer represses antitumor immunity through the exosome-mediated inhibition of dendritic cells.
EGFR	Comparative expression of immunohistochemical biomarkers in cribriform and pattern 4 non-cribriform prostatic adenocarcinoma.
EGFR	Epidermal Growth Factor Receptor and Abl2 Kinase Regulate Distinct Steps of Human Papillomavirus 16 Endocytosis.
EGFR	Characteristics of patients with EGFR-mutant non-small-cell lung cancer who benefited from immune checkpoint inhibitors.
EGFR	The Role of Epidermal Growth Factor Receptor Signaling Pathway during Bovine Herpesvirus 1 Productive Infection in Cell Culture.
EGFR	EGFR-mediated tyrosine phosphorylation of STING determines its trafficking route and cellular innate immunity functions.
EGFR	ILT4 inhibition prevents TAM- and dysfunctional T cell-mediated immunosuppression and enhances the efficacy of anti-PD-L1 therapy in NSCLC with EGFR activation.
EGFR	Treatment outcome and pattern of recurrence of sinonasal squamous cell carcinoma with EGFR-mutation and human papillomavirus.
EGFR	Comparison of the outcome between immunotherapy alone or in combination with chemotherapy in EGFR-mutant non-small cell lung cancer.
EGFR	Immunohistochemical analysis of glassy cell carcinoma of the cervix reveals robust lymphocyte infiltrate and the expression of targetable inhibitory immune checkpoints.
EGFR	The immune microenvironment in EGFR- and ERBB2-mutated lung adenocarcinoma.
EGFR	ISGylation drives basal breast tumour progression by promoting EGFR recycling and Akt signalling.
EGFR	The immunoexpression of epidermal growth factor receptor in cutaneous squamous cell carcinoma.
EGFR	Circular RNA CELF1 drives immunosuppression and anti-PD1 therapy resistance in non-small cell lung cancer via the miR-491-5p/EGFR axis.
EGFR	Epidermal Growth Factor Receptor immunohistochemical expression in hepatocellular carcinoma without Epidermal Growth Factor Receptor exons 18-21 mutations.
EGFR	The impact of TP53 co-mutations and immunologic microenvironment on outcome of lung cancer with EGFR exon 20 insertions.
EGFR	First-line immunotherapy or angiogenesis inhibitor combined with chemotherapy for advanced non-small cell lung cancer with EGFR exon 20 insertions: Real-world evidence from China.
EGFR	Pre-radiotherapy systemic immune inflammation index associated with overall survival in patients with advanced EGFR mutant non-small cell lung cancer receiving thoracic radiotherapy.
EGFR	The miR-7/EGFR axis controls the epithelial cell immunomodulation and regeneration and orchestrates the pathology in inflammatory bowel disease.
EGFR	Epidermal growth factor receptor-dependent stimulation of differentiation by human papillomavirus type 16 E5.
EGFR	Roles of epidermal growth factor receptor, claudin-1 and occludin in multi-step entry of hepatitis C virus into polarized hepatoma spheroids.
EPHA7	Endogenously expressed EPH receptor A7 (EphA7) in BJAB B cells is critical for the cell-to-cell transmission of Kaposi's sarcoma-associated herpesvirus (KSHV) from producer iSLK cells to BJAB target cells. Endogenous EphA7 is precipitated from the cellular lysate of BJAB cells using recombinant gH/gL, and knockout of EphA7 reduces transmission of KSHV into BJAB target cells.
EPHA7	Endogenously expressed EPH receptor A7 (EphA7) in BJAB B cells is critical for the cell-to-cell transmission of Kaposi's sarcoma-associated herpesvirus (KSHV) from producer iSLK cells to BJAB target cells. Endogenous EphA7 is precipitated from the cellular lysate of BJAB cells using recombinant gH/gL, and knockout of EphA7 reduces transmission of KSHV into BJAB target cells.
ERCC6	Genetic pleiotropy of ERCC6 loss-of-function and deleterious missense variants links retinal dystrophy, arrhythmia, and immunodeficiency in diverse ancestries.
ERLIN2	Usp25-Erlin1/2 activity limits cholesterol flux to restrict virus infection.
ERLIN2	Usp25-Erlin1/2 activity limits cholesterol flux to restrict virus infection.
FGFR4	distribution in normal endocrine cells and related tumors of the gastroenteropancreatic system; immunoreactive in rectal L cells and in pancreatic B, PP, and A cells
FGFR4	expression of FGFR4 in intrahepatic cholangiocarcinomas, perihilar cholangiocarcinomas and distal cholangiocarcinomas by immunohistochemistry, and association of FGFR4 with clinicopathologic parameters and survival rate
FKBP5	WAFL may be connected to innate immune-host responses.
FKBP5	knockdown of FKBP5, coding for immunophilin FKBP51, was associated with increased baseline glucocorticoid receptor nuclear localization
FKBP5	knockdown of FKBP5, coding for immunophilin FKBP51, was associated with increased baseline glucocorticoid receptor nuclear localization
FKBP5	these results provide evidence that FKBP5 transcriptional dysregulation together with FKBP4 as its functional antagonist are implicated in biological features of major depressive disorder symptoms in human immunodeficiency virus-infected individuals.
FKBP5	Molecular chaperone activity and biological regulatory actions of the TPR-domain immunophilins FKBP51 and FKBP52
FKBP5	FKBP51 interacts with TRAF proteins and facilitates the expression of type I IFN induced by cytosolic dsRNA. These findings suggest a novel role for FKBP51 in the innate immune response to viral infection.
FKBP5	PPIase-mediated isomerization of proteins represents a unique signaling mechanism that regulates normal immune functions and contributes to the development of immunopathologies.
FKBP5	Findings suggest that posttraumatic stress disorder (PTSD) phenotypes may be characterized by differences in intracellular signaling transduction processes. The associations of expression of GRalpha and FKBP5 in the glucocorticoid (GC) high-sensitive PTSD subgroup may thereby reflect physiological adaptation to preserve immune-relevant GC signaling.
FKBP5	We hypothesize a role for FKBP51 as a prognostic marker for MF and suggest an involvement of this immunophilin in deregulated NF-jB pathway of this CTCL.
FKBP5	The data indicate that binding of IFI44 to FKBP5 decreased the phosphorylation of IRF-3 and IkappaBalpha mediated by IKKepsilon and IKKbeta, respectively, providing a likely explanation for the function of IFI44 in negatively modulating IFN responses.
FKBP5	Alternative macrophage polarisation associated with resistance to anti-PD1 blockade is possibly supported by the splicing of FKBP51 immunophilin in melanoma patients.
FKBP5	The structure of an Hsp90-immunophilin complex reveals cochaperone recognition of the client maturation state.
FUT9	FUT9 was found to be a trans-Golgi and trans-Golgi network (TGN) glycosyltransferase from confocal immunofluorescence co-localization with the markers of the secretory pathway beta4-galactosyltransferase (trans-Golgi and TGN) and TGN-46 (TGN)
GLI3	Topoisomerase IIbeta immunoreactivity (IR) co-localizes with neuronal marker-IR but not glial fibrillary acidic protein-IR in GLI3-positive medulloblastomas: an immunohistochemical analysis of 124 medulloblastomas from the Japan Children's Cancer Group.
GNA15	Exosomal miR-211-5p regulates glucose metabolism, pyroptosis, and immune microenvironment of melanoma through GNA15.
HAUS5	Comprehensive analysis of the correlation of the pan-cancer gene HAUS5 with prognosis and immune infiltration in liver cancer.
HDAC4	ICP0 of herpes simplex virus type 1 interacts with and controls the repressor activity of class II HDAC4
HDAC4	Amino acid starvation induces reactivation of silenced transgenes and latent HIV-1 provirus via down-regulation of histone deacetylase 4
HDAC4	Over-expression of HDAC4 suppressed the transcription of genes involved in energy expenditure in a SIRT1-dependent manner. In contrast, HDAC4 knockdown/inhibition neutralized the effect of IFN-gamma on cellular metabolism by normalizing SIRT1 expression
HDAC4	Decreased risk of sensitization to food allergens was associated with higher H3 acetylation levels in placentas at the IFNG and SH2B3 genes, and for H4 acetylation in HDAC4. Higher HDAC4 H4 acetylation levels were also associated with a decreased risk of sensitization to aeroallergens.
HDAC4	Decreased risk of sensitization to food allergens was associated with higher H3 acetylation levels in placentas at the IFNG and SH2B3 genes, and for H4 acetylation in HDAC4. Higher HDAC4 H4 acetylation levels were also associated with a decreased risk of sensitization to aeroallergens.
HDAC4	The biological importance of HDAC4 as a virus restriction factor.
HDAC9	ICP0 of Herpes simplex virus Type 1 interacts with and controls the repressor activity of class II HDAC7
HDAC9	Endogenous HDAC activity plays a crucial role in maintaining the balance of pre-established T(H)1-like and T(H)2-like responses, inhibiting excessive T(H)2 immunity.
HDAC9	HDAC9 acts as an epigenetic switch in effector T cell-mediated systemic autoimmunity.
HDAC9	Data suggest, in chronic hepatitis C virus infection, HDAC9 (histone deacetylase 9) induction in liver regulates hepatic gluconeogenesis and systemic insulin resistance via deacetylation of FoxO1 (Forkhead box O 1) and HDAC3 (histone deacetylase 3).
HDAC9	Decreased expression and hypomethylation of HDAC9 lead to poor prognosis and inhibit immune cell infiltration in clear cell renal cell carcinoma.
HDAC9	An HDAC9-associated immune-related signature predicts bladder cancer prognosis.
HLF	The patients with immunophenotype of Pre-B-acute lymphoblastic leukemia were found to carry: E2A/PBX1 and E2A/HLF.
IL1RAPL1	IL-1R8 serves as a checkpoint for NK cell maturation and effector function; its genetic blockade unleashes NK-cell-mediated resistance to hepatic carcinogenesis, haematogenous liver and lung metastasis, and cytomegalovirus infection in mice
IL6R	Production of sIL-6R by autoreactive CD4 T cells may contribute to their role in the development of autoimmune disease by conferring IL-6-responsiveness to cells lacking IL-6R such as synoviocytes.
IL6R	Hepatitis C virus-induced changes in miRNA-449a and miRNA-107 regulate CCL2 expression by activation of the IL-6-mediated signaling cascade by targeting components of the interleukin-6 receptor complex.
IL6R	Anti-IL-6R antibody prevented the early loss of intrahepatic islet grafts mediated by HMGB1-induced immune activation after islet transplantation.
IL6R	Data suggest that targeting interactions of interleukin-6 (IL6) and interleukin-6 receptors (IL6R) provides effective treatment in autoimmune diseases and cancers. [REVIEW]
IL6R	the sIL-6R/p28 fusion protein (FP) upregulated IFN-lambda1 expression by increasing the binding abilities of c-Fos and activating transcription factor 1 to the IFN-lambda1 promoter via the p38 MAPK signaling pathway; results demonstrate the important role of sIL-6R/p28 FP in mediating virus-induced type III IFN production
IL6R	Our results argued that increased expression of sIL6R from myeloid cells and subsequent c-Maf induction were adverse events for counteracting tumor-specific Th1 generation. Overall, this work provides a mechanistic rationale for sIL6R targeting to improve the efficacy of T-cell-mediated cancer immunotherapy
IL6R	Enterovirus 71 antagonizes the antiviral activity of host STAT3 and IL-6R with partial dependence on virus-induced miR-124.
IL6R	Study in Chinese Yunnan chronic hepatitis C virus (HCV) infection patients revealed that genotype AA of IL6R rs4075015 and GG of HNF4A rs3212172 increased the risk of HCV infection, but the genotype AA of IL6R rs7553796 played a protective role in HCV. High-density lipoprotein cholesterol (HDL-C) level was associated with genotype of IL6R rs4845617.
IL6R	Defining the biological responses of IL-6 by the study of a novel IL-6 receptor chain immunodeficiency.
IL6R	Discovery of IL-6 and development of anti-IL-6R antibody for the treatment of autoimmune diseases have been described. (Review)
IL6R	Human immune cell mobilization during exercise: effect of IL-6 receptor blockade.
IL6R	Genome-wide pleiotropy analysis of coronary artery disease and pneumonia identifies shared immune pathways.
ITGB1	upon treatment with phorbol esters, K562 cells become adherent and permissive for parvovirus B19 entry, which is mediated by alpha 5 beta 1 integrins, but only in their high-affinity conformation
ITGB1	Monkey rotavirus binding to alpha2beta1 integrin requires the alpha2 I domain and is facilitated by the homologous beta1 subunit.
ITGB1	results suggest that a direct interaction occurs between the Adenovirus penton base protein and the integrin receptor alpha3beta1 in vitro and in vivo
ITGB1	IFN-gamma attenuates epithelial wound closure by microtubule-dependent redirection of beta(1) integrin transcytosis from the leading edge of migrating cells thereby inhibiting adequate turnover of focal adhesion complexes and cell migration.
ITGB1	facilitates reovirus internalization and suggest that viral entry occurs by interactions of reovirus virions with independent attachment and entry receptors on the cell surface.
ITGB1	This study identifies alpha2 beta1 integrin as an important regulatory pathway of IFN-gamma expression and provides novel insights into the signaling mechanisms of integrin costimulation in T cells.
ITGB1	results define a crucial role for alpha1beta1 in controlling the accumulation of epidermal type 1 polarized effector memory T cells in a common human immunopathology and provide the basis for new strategies in psoriasis treatment
ITGB1	These results indicate that NSP4 interaction with integrin alpha1 and alpha2 is an important component of enterotoxin function and rotavirus pathogenesis, further distinguishing this viral virulence factor from other microbial enterotoxins.
ITGB1	alpha(2)-, alpha(3)-, and beta(1)-integrins and E-cadherin expression in normal human lung and bronchopulmonary sequestration and congenital cystic adenomatoid malformation were evaluated using Western blot and immunohistochemistry.
ITGB1	Alpha5beta1-integrin controls ebolavirus entry by regulating endosomal cathepsins
ITGB1	Detecting intracellular Erk1/2 phosphorylation and IL-2 and IFN-g production, study confirmed that multiple signals, including VLA-4 engagement, are necessary for maximal T-cell activation beyond that induced via the TCR and CD28.
ITGB1	in its entry strategy human echovirus 1 seems to rely on the activation of signalling pathways that are dependent on alpha2beta1 clustering, but do not require the conformational regulation of the receptor
ITGB1	The authors identify beta(1) integrin, which is expressed by naive B cells of distinct lymphoid origin and by memory B cells from nasal mucosa-associated lymphoid tissue, as a mediator of increased susceptibility to infection by Epstein-Barr virus.
ITGB1	The authors identify beta(1) integrin, which is expressed by naive B cells of distinct lymphoid origin and by memory B cells from nasal mucosa-associated lymphoid tissue, as a mediator of increased susceptibility to infection by Epstein-Barr virus.
ITGB1	Both wild-type and internal tandem duplication (ITD)-FLT3 proteins co-immunoprecipitated with beta1 integrin and Pyk2 indicating the signal crosstalk between FLT3, beta1 integrin and Pyk2.
ITGB1	expression of VLA-4 in PBMC of hemorrhagic fever with renal syndrome (HFRS) patients at different stages were higher than normal controls, except recovery stage; VLA-4 might play an important role in the immunopathological lesions of HFRS
ITGB1	Enterovirus 71 induces integrin beta1/EGFR-Rac1-dependent oxidative stress in SK-N-SH cells. Up-regulation of HO-1 exerts as a host cellular defense mechanism against EV71 infection in SK-N-SH cells.
ITGB1	maspin, uPAR, and beta1 integrin co-immunoprecipitate, suggesting a novel maspin-uPA-uPAR-beta1 integrin mega-complex that regulates mammary epithelial cell adhesion.
ITGB1	a novel virus- and clustering-specific pathway that diverts alpha2beta1 integrin from its normal endo/exocytic traffic to a nonrecycling, calpain-dependent degradative endosomal route
ITGB1	cell surface protein disulfide isomerase colocalized with beta1 and beta3 integrins after dengue virus infection
ITGB1	Integrin beta1 mediates vaccinia virus entry through activation of PI3K/Akt signaling.
ITGB1	Usage of internal N-acetylneuraminic acids and alpha2beta1 integrin by Wa rotavirus was at least partially additive.
ITGB1	Baicalin regulates immune balance and relieves the ulcerative colitis-induced inflammation reaction by promoting proliferation of CD4(+)CD29(+) cells and modulating immunosuppressive pathways.
ITGB1	CD105 and CD29 immunoexpression in decidua basalis, fetal membrane and placental villi showed significant negative correlations with the maternal age
ITGB1	in some cell lines the cellular entry of human parechovirus 1(HPeV-1) is primarily mediated by the active form of alphaVbeta1 integrin without visible receptor clustering
ITGB1	Competition binding and infection experiments and biochemical assays pointed out alphaVbeta1 and alpha3beta1 to be of importance for human adenovirus-37 infection of corneal tissue.
ITGB1	Our results suggest that an impairment in adhesion exists in vitiligo skin, which is supported by the diminished immunohistochemical expression of laminin, beta1 integrin, ICAM-1 and VCAM-1.
ITGB1	Dissecting Integrin Expression and Function on Memory B Cells in Mice and Humans in Autoimmunity.
